# Supplementary material for: Filarial Antigenemia and Loa loa Night Blood Microfilaremia in an Area Without Bancroftian Filariasis in the Democratic Republic of Congo
Source: PubMed Central journal article supplement (PMC4257636; doi:10.4269/ajtmh.14-0358), 2014-12-03
Supplement: SD2.pdf [file SD2.pdf]

SUPPLEMENTAL TABLE 1

Geographic coordinates for villages examined for filarial antigenemia and night blood microfilaremia in the Ituri and Haut Uele regions of the northeastern Democratic Republic of Congo

| Region/village name    | Longitude        | Latitude        | Elevation (m) |
|------------------------|------------------|-----------------|---------------|
| <b>Ituri/Mambasa</b>   |                  |                 |               |
| Memekidele             | E 29°01'24.7"    | N 01°52'12.7"   | 658           |
| Aluta                  | E 29°03'26.2"    | N 01°43'32.0"   | 895           |
| KeroZanzibar           | E 29°02'36.2"    | N 01°25'45.2"   | 866           |
| Digbo                  | E 28°44'58.3'    | N 02°18'59.2"   | 826           |
| Ekwe                   | E 29°02'58.0"    | N 01°27'23.3'   | 858           |
| Epulu                  | E 28°34'19.3'    | N 01°24'13.1"   | 754           |
| Salate                 | E 28°23'43.0"    | N 01°24'12.9"   | 739           |
| Saiyo                  | E 28° 58' 56.4"  | N 01°22'05.8"   | 837           |
| Nduye                  | E 28°59'58.2"    | N 01°49'40.6"   | 823           |
| Komboni                | E 28°56'01.9"    | N 01°53'26.3'   | 828           |
| Molokayi               | E 28°16'52.5'    | N 01°26'08.1"   | 686           |
| Malembi                | E 28°47'06.6"    | N 02°15'12.8"   | 843           |
| Bapukeli               | E 28° 36' 58.5"  | N 01°23'26.1"   | 791           |
| Butiaba 2              | E 29° 02' 48.8"  | N 01°19'40.3'   | 913           |
| <b>Haut Uele/Watsa</b> |                  |                 |               |
| Bayitebi               | E 28° 49' 04.1"  | N 02° 37' 06.6" | 858           |
| Obo II                 | E 29° 10' 00.9"  | N 02° 51' 28.9" | 856           |
| Kossia                 | E 28° 27' 08.4"  | N 02° 37' 21.4" | 819           |
| Obo I                  | E 28° 26' 08.6"  | N 02° 51' 29.7" | 854           |
| Luwi                   | E 29° 09' 34.6"  | N 02° 49' 09.1" | 843           |
| Apodo                  | E 28° 38' 45.5"  | N 02° 35' 48.8" | 851           |
| Netiti-Gombari         | E 29°27' 08.5"   | N 02° 38' 24.9" | 859           |
| Tibodri                | E 28° 25' 09.6"  | N 02° 36' 27.4" | 876           |
| Bakiri                 | E 28° 26' 07.5"  | N 02° 38' 23.9" | 820           |
| Dodi                   | E 28° 27' 09.3"  | N 02° 36' 27.7" | 817           |
| Andekofu               | E 29° 20' 02.00" | N 02° 58' 43.1" | 1,008         |
| Osso I                 | E 29° 24' 26.2"  | N 02° 49' 52.7" | 946           |
| Kadungu                | E 29° 25' 25.3"  | N 02° 49' 53.8" | 940           |
| Ngili-ngili            | E 29° 33' 06.8"  | N 02° 51' 52.7" | 983           |
| Andra                  | E 29° 21' 57.7"  | N 02° 56' 16.8" | 915           |
| Toli                   | E 29° 19' 01.1"  | N 02° 57' 44.0" | 1,012         |
